# Supplementary material for: One Tree at a Time: Restoring Landscape Connectivity through Silvopastoral Systems in Transformed Amazon Landscapes
Source: MDPI journal article supplement (doi:10.3390/d14100846), 2022-10-07
Supplement: s1 [file s1]

Archive with 1 entries (1 files):
- diversity-1822999-supplementary.pdf
